# Supplementary material for: Placental O-GlcNAc-transferase expression and interactions with the glucocorticoid receptor are sex specific and regulated by maternal corticosterone exposure in mice
Source: PubMed Central journal article supplement (PMC5435684; doi:10.1038/s41598-017-01666-8), 2017-05-17

Supplementary Information

**Placental O-GlcNAc-transferase expression and interactions with the glucocorticoid receptor are sex specific and regulated by maternal corticosterone exposure in mice.**

Marie Pantaleon, Sarah E Steane, Kathryn McMahon James SM Cuffe\* and Karen M Moritz\*

**\*Authors contributed equally**

Raw images of Western blots used for figures 1-5

Figure 1F  
OGT

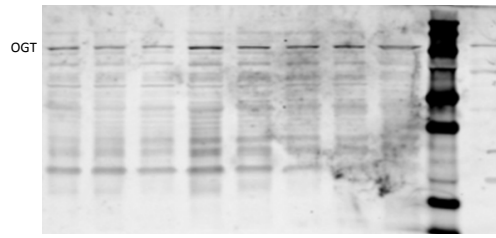

Figure 1F  
ACTB

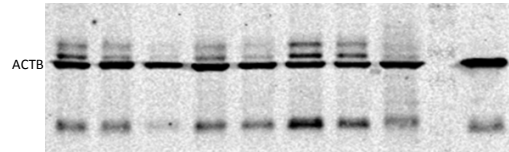

Figure 2F  
Males HSP90

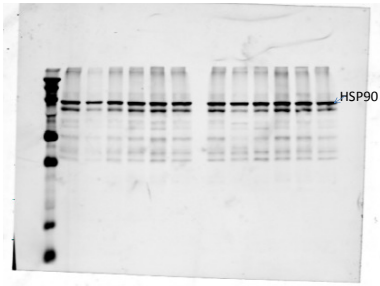

Figure 2F  
Males ACTB

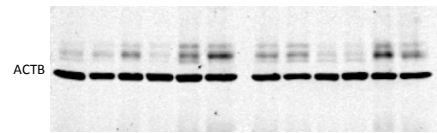

Figure 2F  
Females HSP90

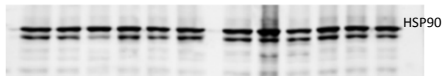

Figure 2F  
Females ACTB

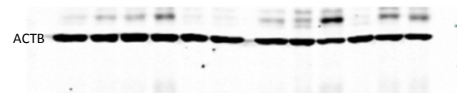

Figure 3A  
Males OGT

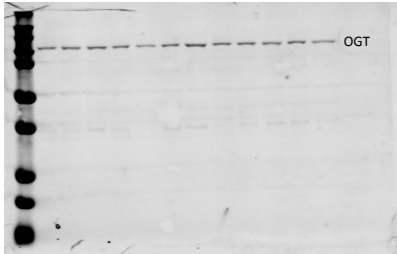

Figure 3A  
Males ACTB

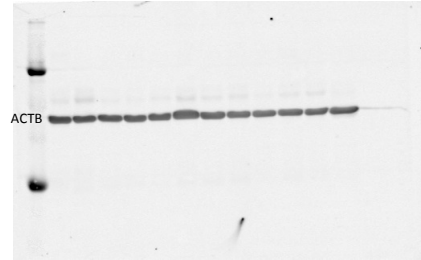

Figure 3A  
Females OGT

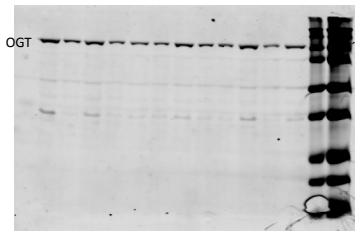

Figure 3A  
Females ACTB

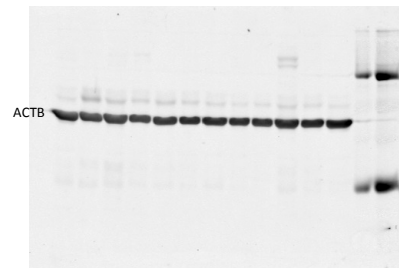

Figure 3B  
Males O-GlcNac

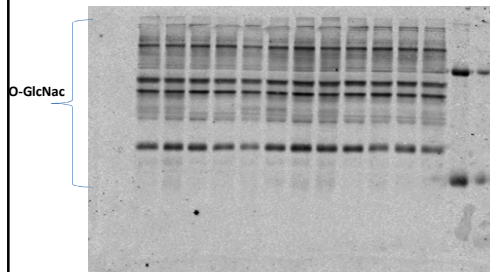

Figure 3B  
Males ACTB

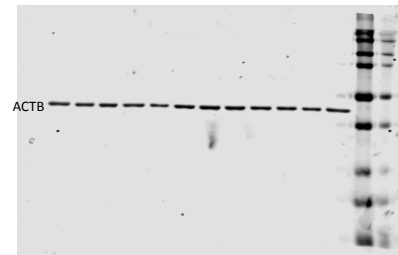

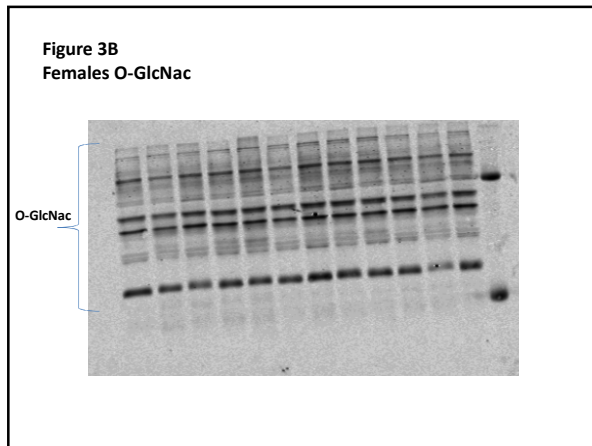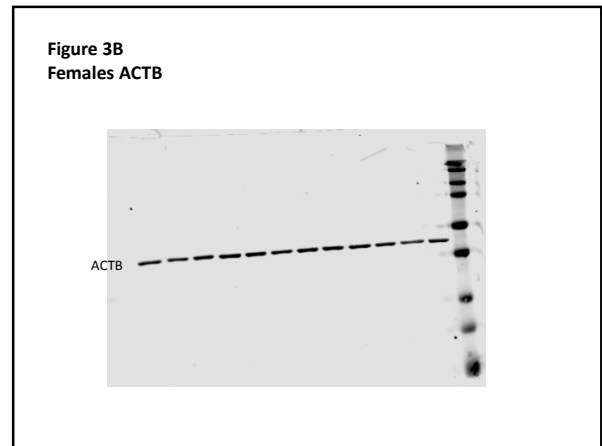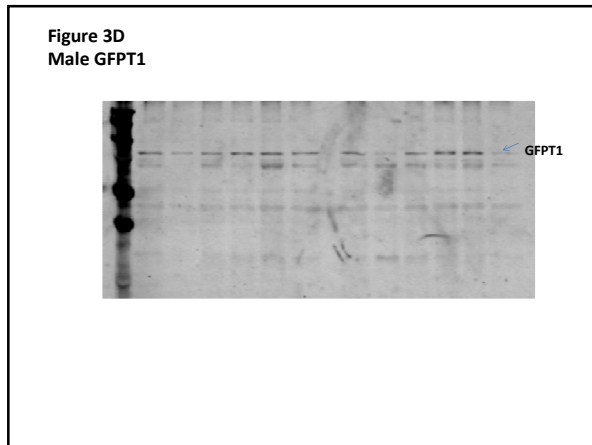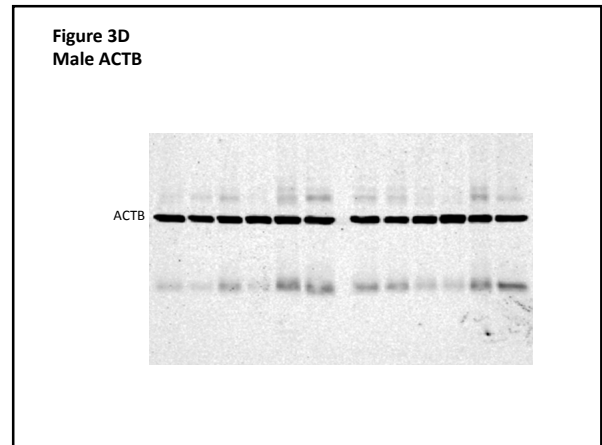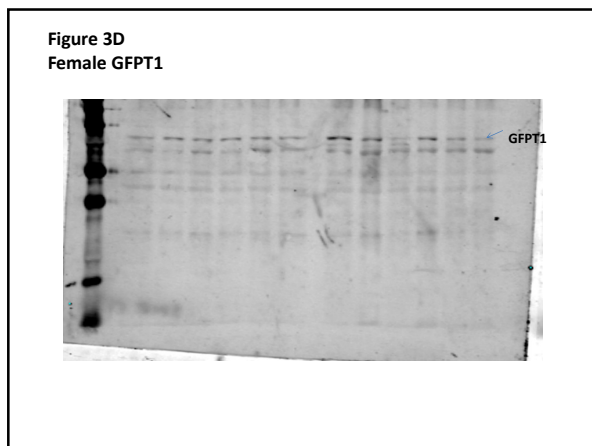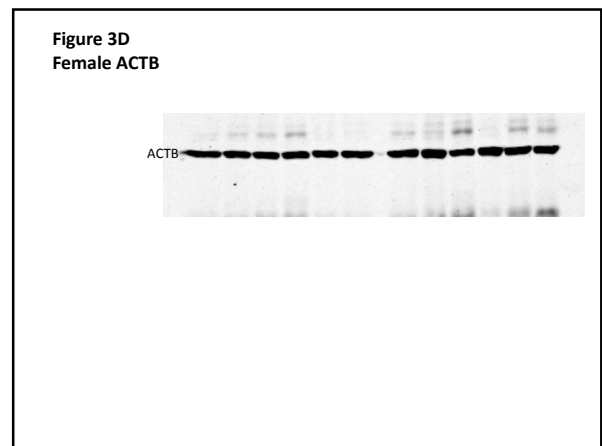

Figure 4A and 4C  
Males p(S473) Akt1 and ACTB

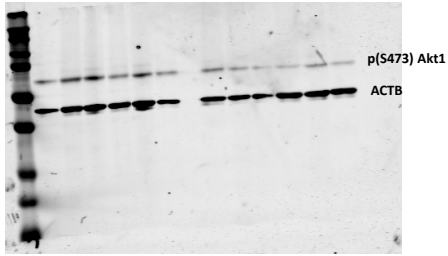

Figure 4A and 4C  
Females p(S473) Akt1 and ACTB

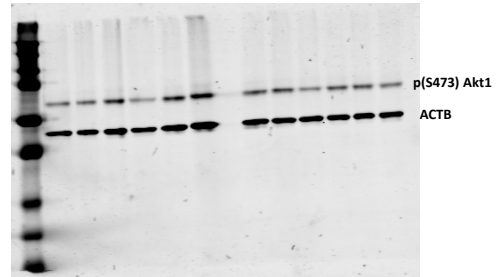

Figure 4C  
Males Total Akt1

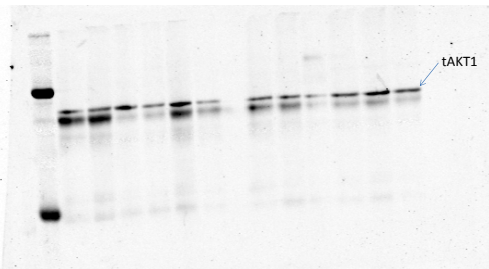

Figure 4C  
Females Total Akt1

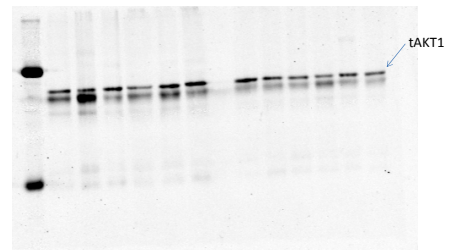

Figure 4B  
Males p(S474)Akt2

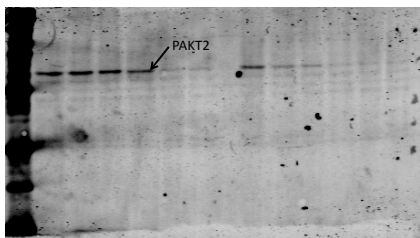

Figure 4B  
Females p(S474)Akt2

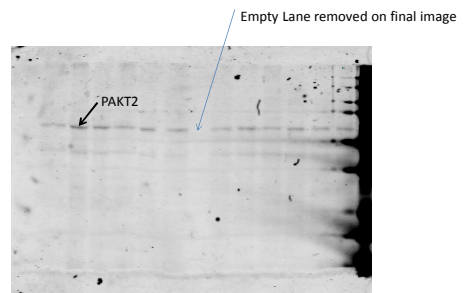

First band excluded to match sample number

Figures 4B and 4D  
Males Total AKT2

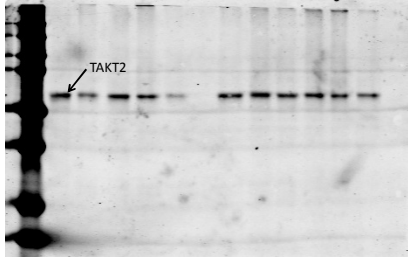

Figures 4B and 4D  
Females Total AKT2

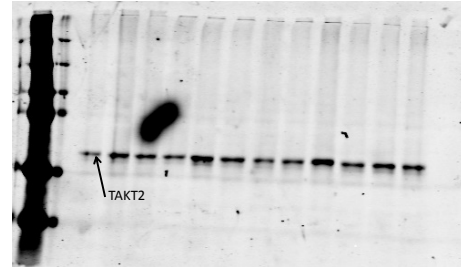

First band excluded to match sample number

Figures 4B and 4D  
Males ACTB

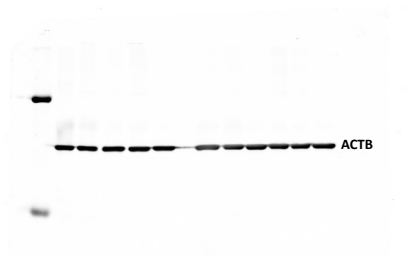

Figures 4B and 4D  
Females ACTB

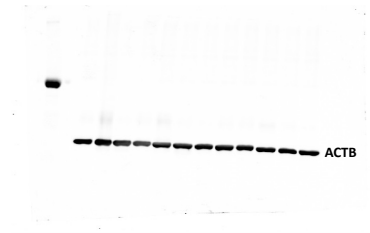

Figure 4E  
Males p(T308) AKT

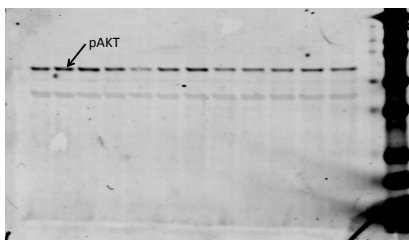

Figure 4E  
Males Total AKT and ACTB

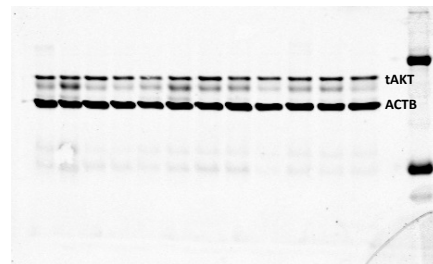

**Figure 4E**  
Females p(T308) AKT

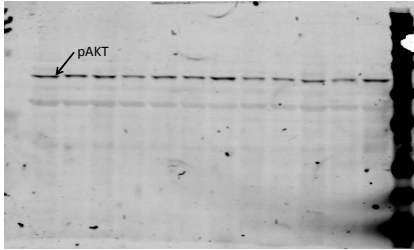

**Figure 4E**  
Males Total AKT and ACTB

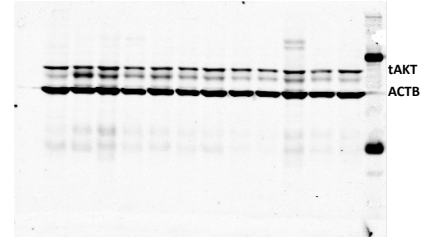

**Figure 4F**  
O-GlcNacylated AKT

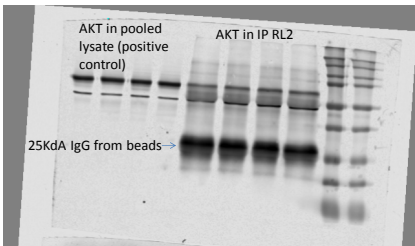

**Figure 5A**  
Males GR $\alpha$

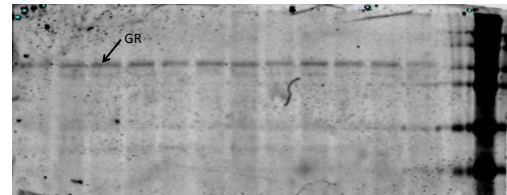

**Figure 5A**  
Males ACTB

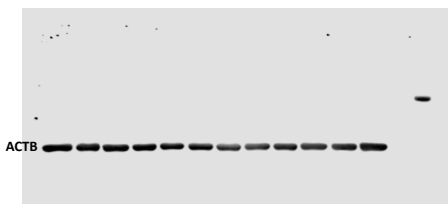

**Figure 5B**  
GR $\alpha$  male and female untreated

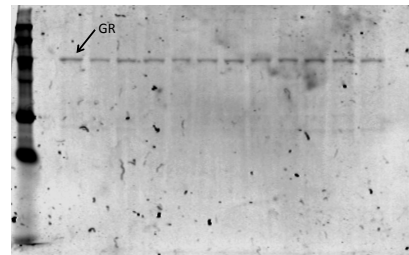

**Figure 5B**  
Male and female untreated ACTB

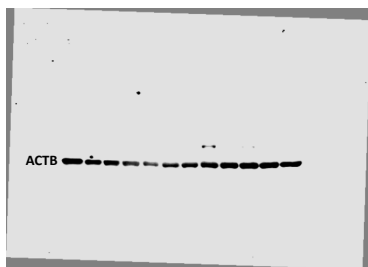

**Figure 5C**  
Males and Females OGT/GR $\alpha$  Immunoprecipitate

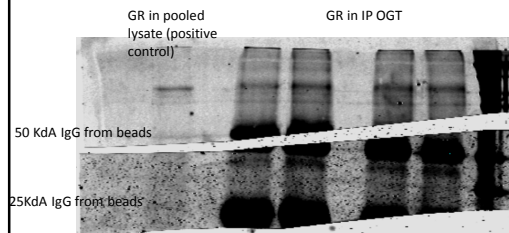

Supplement: 41598_2017_1666_MOESM1_ESM.pdf [file 41598_2017_1666_MOESM1_ESM.pdf]
